# Supplementary material for: Metabolomic Profiling (LC–MS2) of Flowers and Bee Honey of Dzidzilche (Gymnopodium floribundum Rolfe) and Jabin (Piscidia piscipula L. Sarg.) from Yucatán, México
Source: MDPI journal article supplement (doi:10.3390/pr11103028), 2023-10-20
Supplement: s1 [file s1]

**Metabolomic Profiling (LC–MS<sup>2</sup>) of Flowers and Bee Honey of Dzidzilche  
(*Gymnopodium floribundum* Rolfe) and Jabin (*Piscidia piscipula* L. Sarg.) from  
Yucatán, México**

**SUPPLEMENTARY MATERIAL**

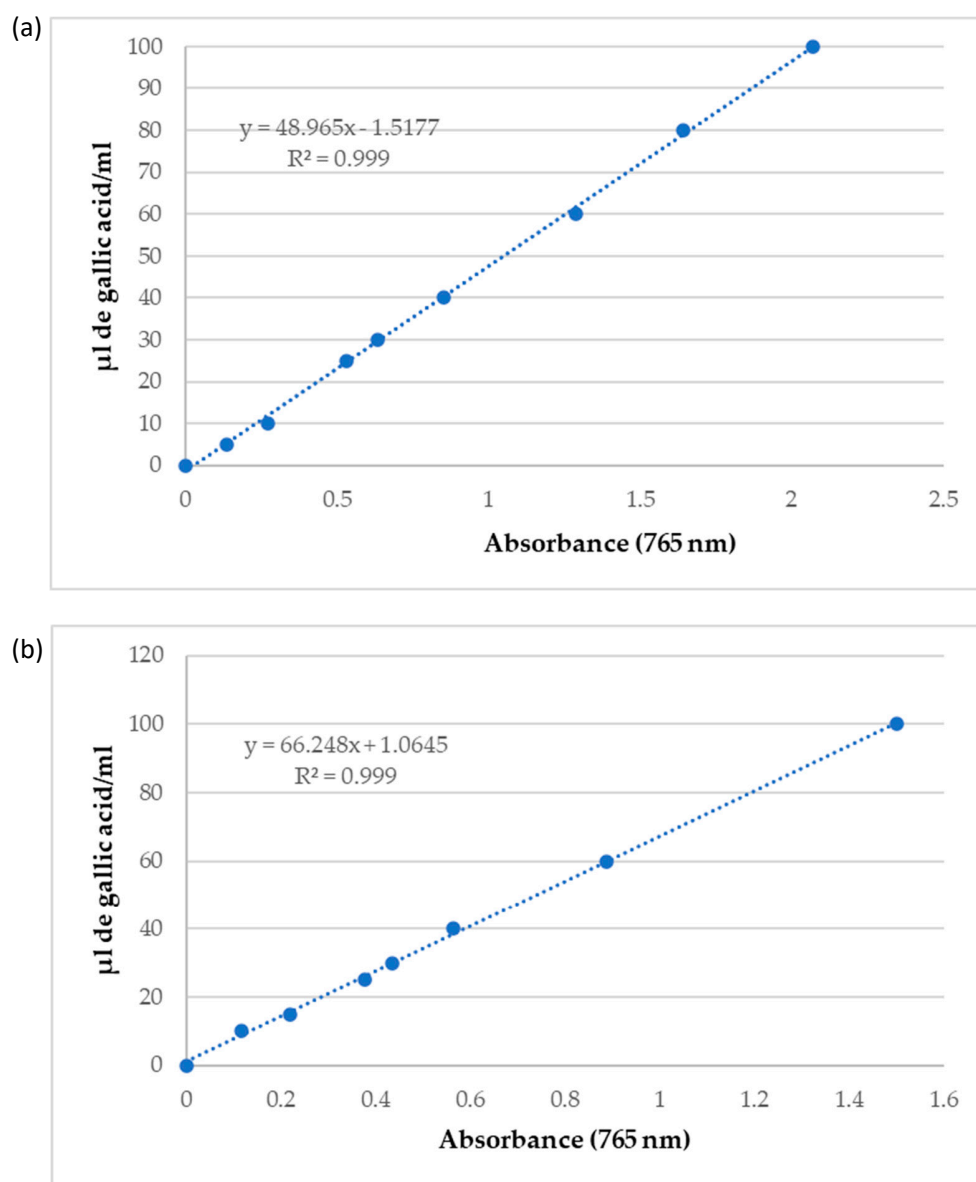

**Figure S1.** Calibration curve for Total polyphenol content in (a) flower samples and (b) honey samples.

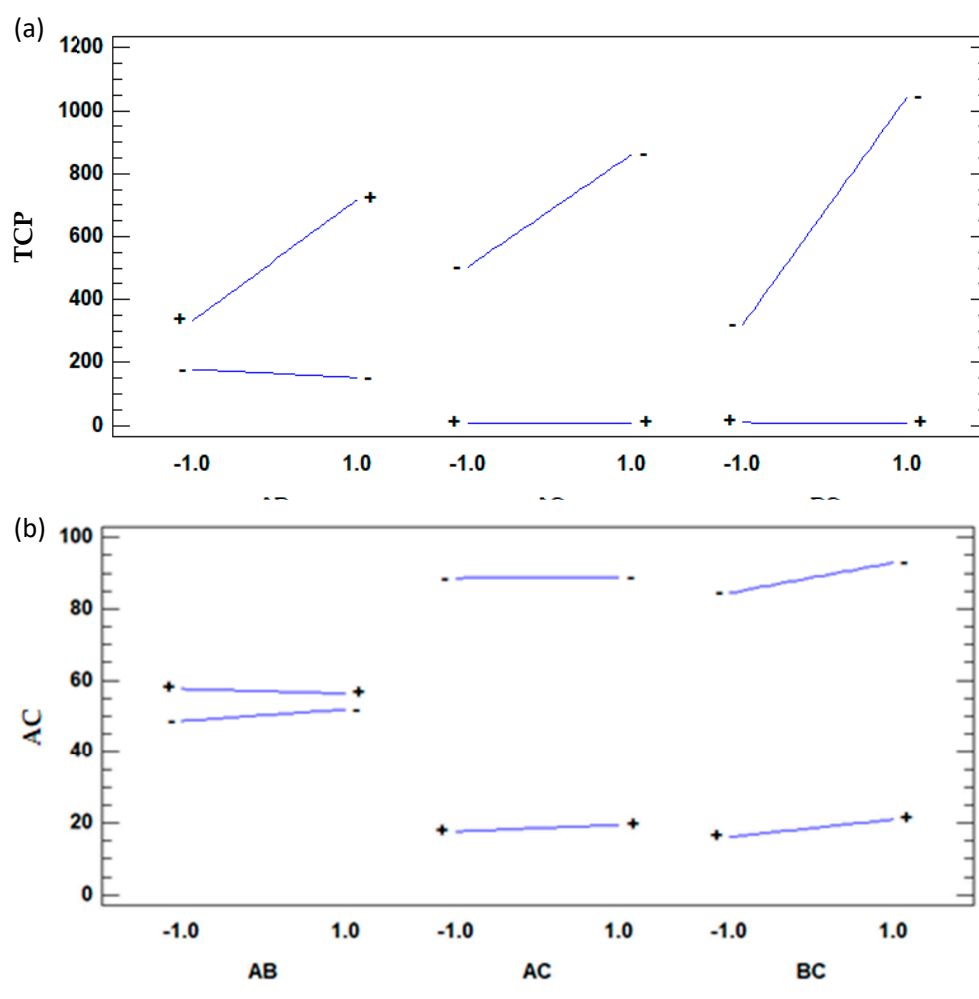

**Figure S2.** Interaction chart of (a) total polyphenol content and (b) antioxidant capacity. Abbreviations: A = botanical origin; B = Geographical origin; C = raw material.

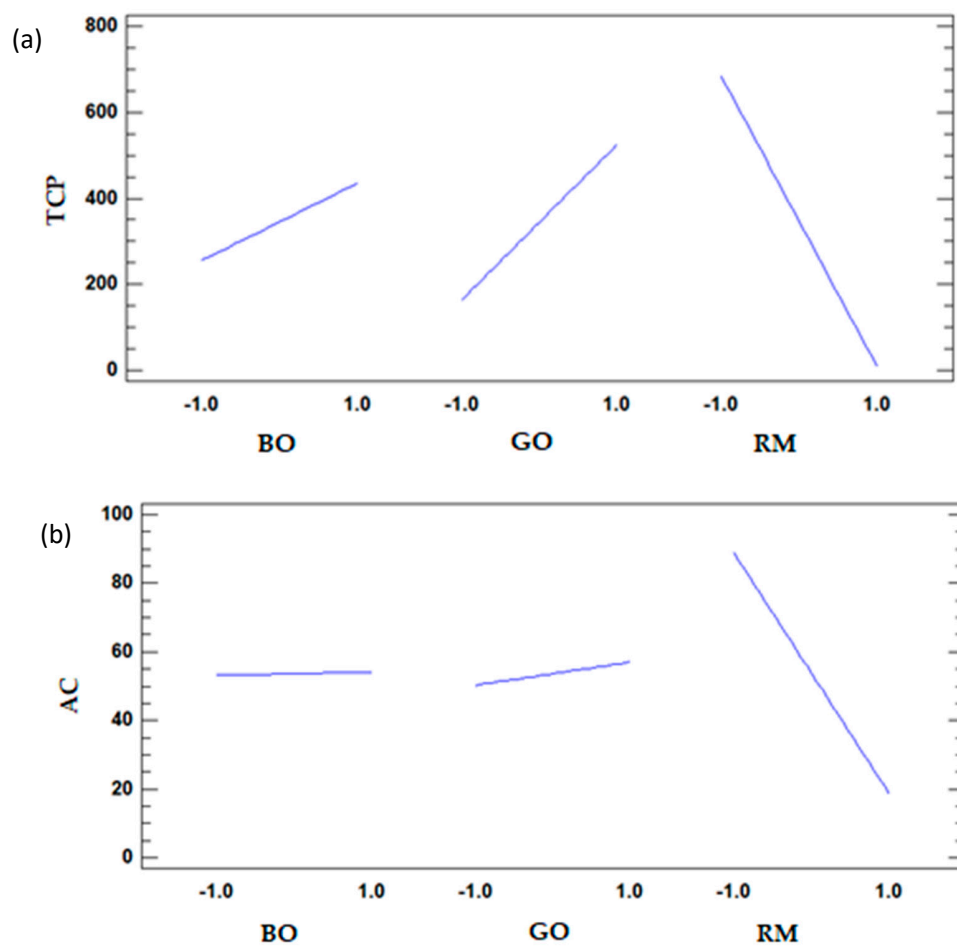

**Figure S3.** Main Effect plot of (a) total polyphenol content and (b) antioxidant capacity. Abbreviations: BO = botanical origin; GO = Geographical origin; RM = raw material.

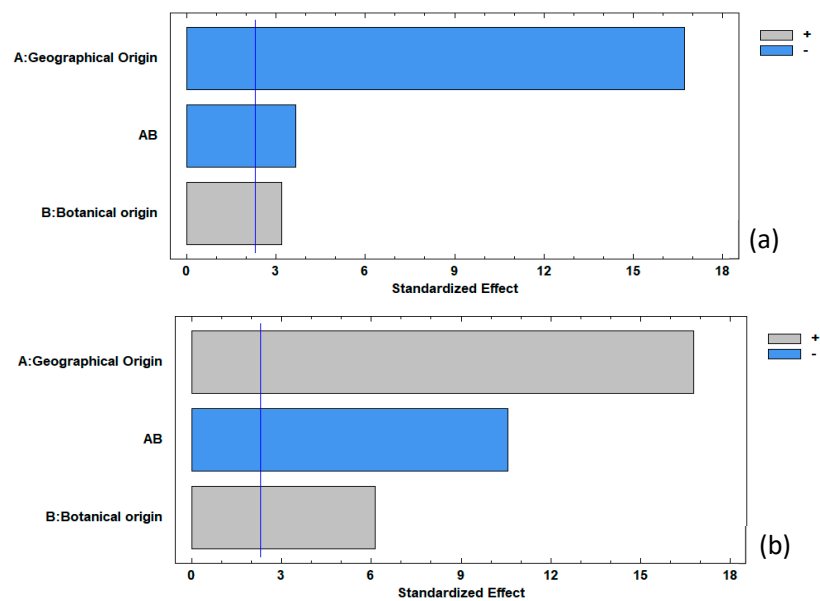

**Figure S4.** Pareto chart of (a) Total polyphenol content and (b) Antioxidant capacity in honey.

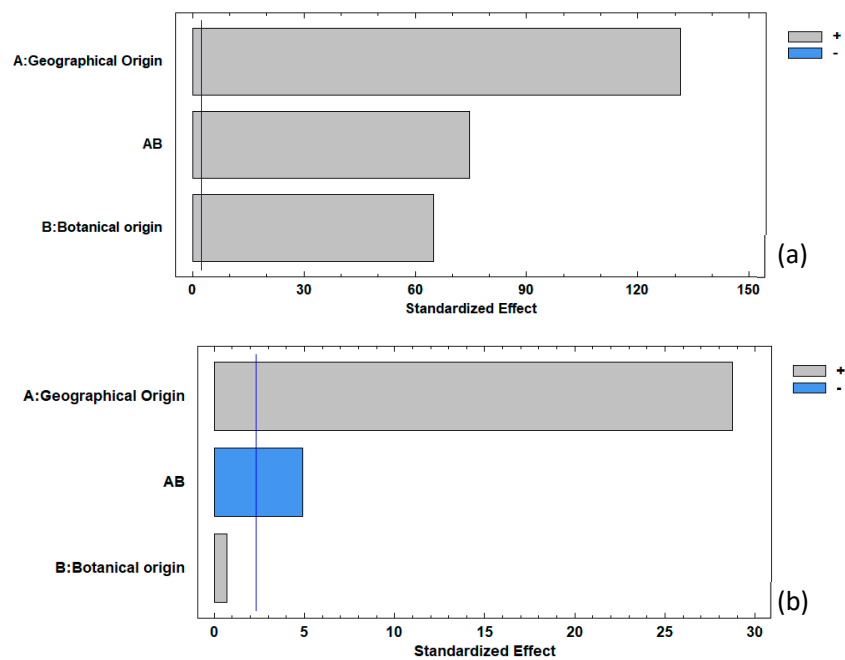

**Figure S5.** Pareto chart of (a) Total polyphenol content and (b) Antioxidant capacity in flower.

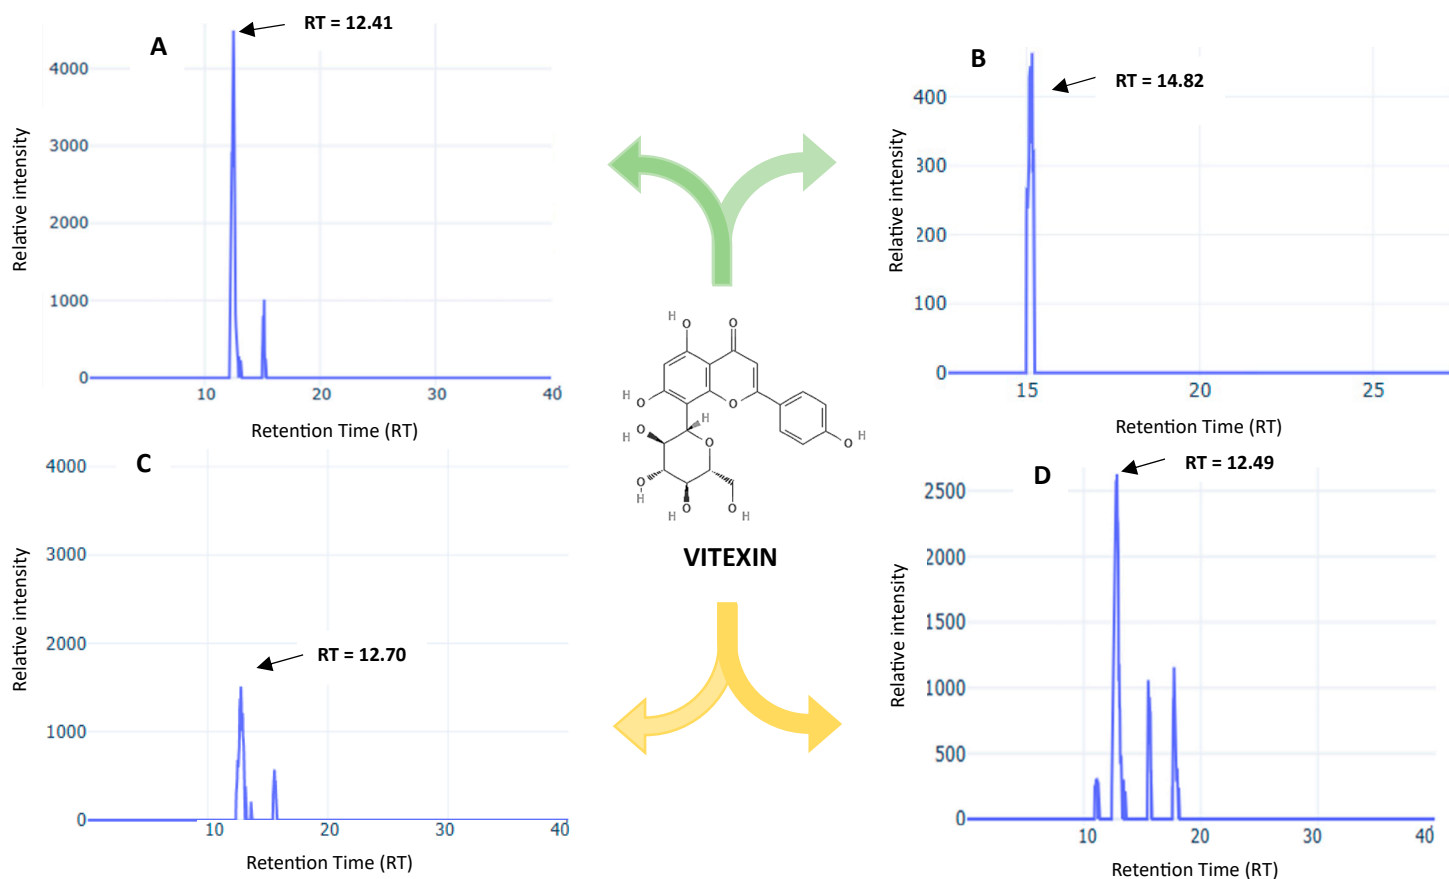

**Figure S6.** Representative chromatogram used for the analysis of vitexin. A)

Extracted ion chromatogram for *Gymnopodium floribundum* flower from Acanceh; B) Extracted ion chromatogram for *Gymnopodium floribundum* honey from Acanceh; C) Extracted ion chromatogram for *Gymnopodium floribundum* flower from Tahdziu; D) Extracted ion chromatogram for *Gymnopodium floribundum* honey from Tahdziu.

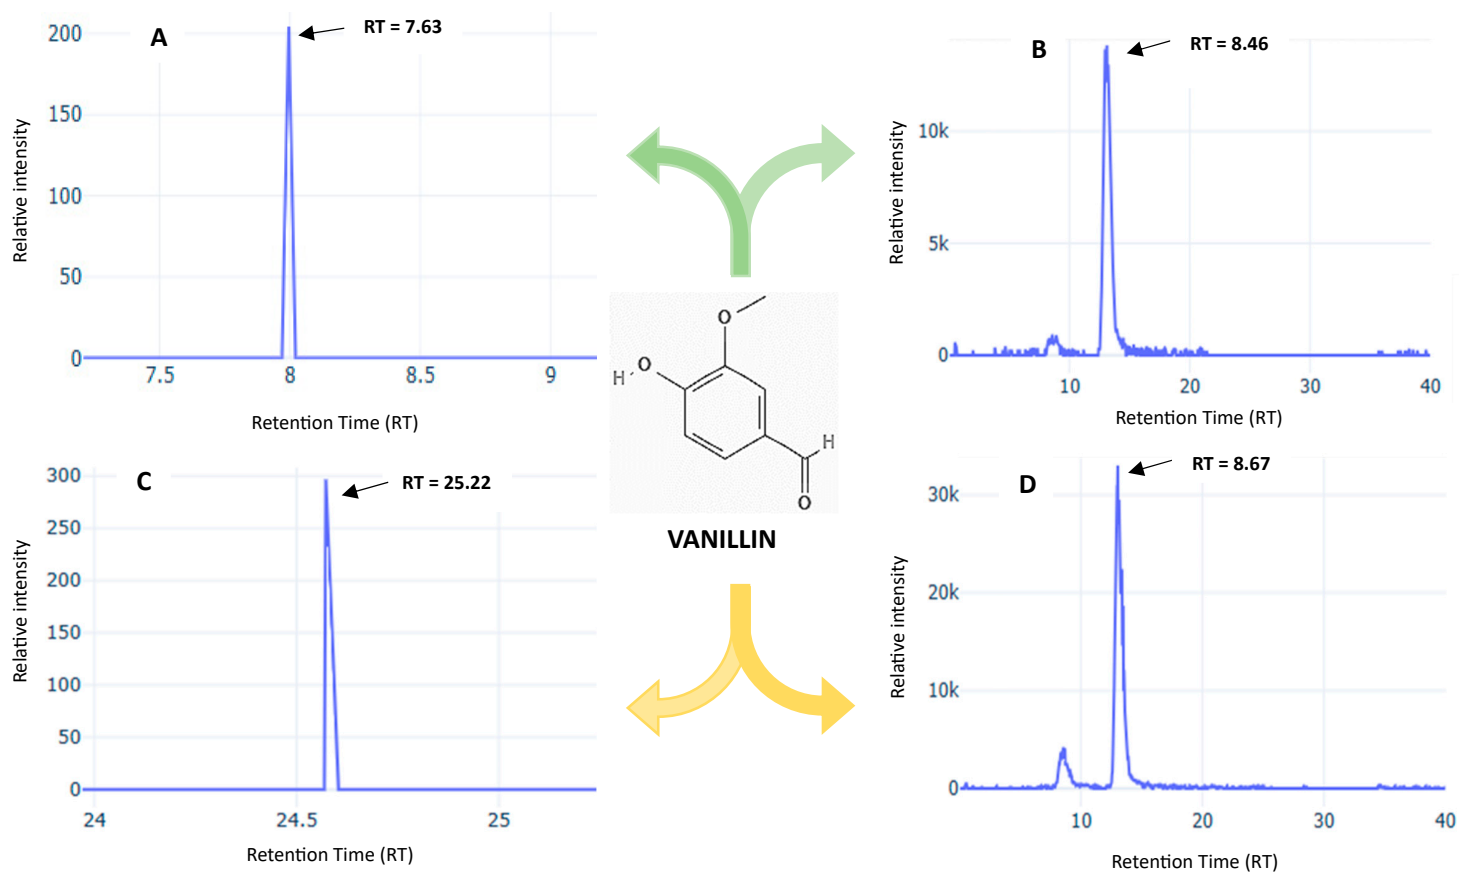

**Figure S7.** Representative chromatogram used for the analysis of vanillin. A) Extracted ion chromatogram for *Piscidia piscipula* flower from Acanceh; B) Extracted ion chromatogram for *Piscidia piscipula* honey from Acanceh; C) Extracted ion chromatogram for *Piscidia piscipula* flower from Tahdziu; D) Extracted ion chromatogram for *Piscidia piscipula* honey from Tahdziu.

**Table S1.** List of metabolites putatively annotated using spectral libraries and in-silico predictions in honey.

| Chemical class                             | Compound Name                                                                                                                     | Molecular  | Annotation   |
|--------------------------------------------|-----------------------------------------------------------------------------------------------------------------------------------|------------|--------------|
| <b>BENZENE AND SUBSTITUTED DERIVATIVES</b> | Phenylacetic Acid                                                                                                                 | C8H8O2     | GNPS         |
|                                            | 4-Hydroxybenzoic acid                                                                                                             | C7H6O3     | GNPS         |
|                                            | Benzylideneacetone                                                                                                                | C10H10O    | GNPS         |
|                                            | 3-Methoxybenzoic acid                                                                                                             | C8H8O3     | GNPS         |
|                                            | Veratric acid                                                                                                                     | C9H10O4    | CSI:FingerID |
|                                            | 3-Methylsalicylic acid                                                                                                            | C8H8O3     | GNPS         |
| <b>CARBOXYLIC ACIDS AND DERIVATIVES</b>    | Phenylalanine                                                                                                                     | C9H11NO2   | GNPS         |
|                                            | Tyrosine                                                                                                                          | C9H11NO3   | GNPS         |
|                                            | N-(Phenylacetyl)phenylalanine                                                                                                     | C17H17NO3  | CSI:FingerID |
|                                            | N-Fructosyl-isoleucine                                                                                                            | C12H23NO7  | GNPS         |
|                                            | N-Fructosyl-phenylalanine                                                                                                         | C15H21NO7  | CSI:FingerID |
|                                            | N-Jasmonoyl-leucine                                                                                                               | C18H29NO4  | GNPS         |
|                                            | N-(1-Deoxy-1-fructosyl) phenylalanine                                                                                             | C15H21NO7  | GNPS         |
|                                            | N-Acetyl-phenylalanine                                                                                                            | C11H13NO3  | GNPS         |
| <b>DIAZANAPHTHALENES</b>                   | 2-[[4-Amino-3-(3-Hydroxyprop-1-Yn-1-Yl)-1h-Pyrazolo[3,4-D]pyrimidin-1-Yl]methyl]-5-Methyl-3-(2-Methylphenyl) quinazolin-4(3h)-One | C25H21N7O2 | GNPS         |
| <b>FATTY ACYLS</b>                         | Decanedioic acid                                                                                                                  | C10H18O4   | CSI:FingerID |
|                                            | Palmitoleic acid                                                                                                                  | C16H30O2   | GNPS         |
| <b>FLAVONOIDS</b>                          | Naringin                                                                                                                          | C27H32O14  | GNPS         |
|                                            | Vitexin                                                                                                                           | C21H20O10  | GNPS         |
|                                            | Quercitrin                                                                                                                        | C21H20O11  | GNPS         |
|                                            | Quercetin-3-O-rhamnoside                                                                                                          | C21H20O11  | GNPS         |
|                                            | Kaempferol-3-rhamninoside                                                                                                         | C33H40O19  | GNPS         |
|                                            | Quercetin                                                                                                                         | C15H10O7   | GNPS         |
|                                            | Afzelin                                                                                                                           | C21H20O10  | GNPS         |
|                                            | 3,5-Dihydroxy-2-(4-hydroxyphenyl)-7-[(3,4,5-trihydroxy-6-methyltetrahydro-2H-pyran-2-yl) oxy]-4H-1-benzopyran-4-one               | C21H20O10  | GNPS         |
|                                            | 3"-O-L-Rhamnopyranosylastragalin                                                                                                  | C27H30O15  | GNPS         |
|                                            |                                                                                                                                   |            |              |
| <b>GLYCEROLIPIDS</b>                       | TAG (16:0/16:0/18:1)                                                                                                              | C53H100O6  | GNPS         |
|                                            | TAG (16:0/18:1/18:1)                                                                                                              | C55H102O6  | GNPS         |

|                                   |                                                                                                                                                                                   |            |              |
|-----------------------------------|-----------------------------------------------------------------------------------------------------------------------------------------------------------------------------------|------------|--------------|
|                                   | 1-Hexadecanoyl-sn-glycerol                                                                                                                                                        | C19H38O4   | GNPS         |
| <b>GLYCEROPHOSPHOLIPIDS</b>       | PE (16:0/18:1(9Z))                                                                                                                                                                | C39H76NO8P | GNPS         |
|                                   | PC (18:1(9Z) /18:3(6Z,9Z,12Z))                                                                                                                                                    | C44H80NO8P | MolDiscovery |
| <b>ISOFLAVONOIDS</b>              | Puerarin                                                                                                                                                                          | C21H20O9   | GNPS         |
| <b>L-DAPS (FENOLIC ACID)</b>      | Chalcone                                                                                                                                                                          | C15H12O    | GNPS         |
| <b>L-DAPS</b>                     | 3-(4-Hydroxy-phenyl)-1-phenyl-prop-2-en-1-one                                                                                                                                     | C15H12O2   | GNPS         |
| <b>ORGANOXYGEN COMPOUNDS</b>      | Fructose                                                                                                                                                                          | C6H12O6    | GNPS         |
|                                   | Glucose                                                                                                                                                                           | C6H12O6    | GNPS         |
|                                   | Dianthoside                                                                                                                                                                       | C12H16O8   | GNPS         |
|                                   | Cellobiose                                                                                                                                                                        | C12H22O11  | GNPS         |
|                                   | Sucrose                                                                                                                                                                           | C12H22O11  | GNPS         |
|                                   | Maltotriose                                                                                                                                                                       | C18H32O16  | GNPS         |
|                                   | p-Formylphenol                                                                                                                                                                    | C7H6O2     | GNPS         |
|                                   | 2,4,7,9-Tetramethyl-5-decyne-4,7-diol                                                                                                                                             | C14H26O2   | GNPS         |
| <b>OXEPANES</b>                   | Levogluconan                                                                                                                                                                      | C6H10O5    | GNPS         |
|                                   | 6-methyl-10,12-dioxatricyclo [7.2.1.02,7] dodec-4-en-8-one                                                                                                                        | C11H14O3   | GNPS         |
| <b>PHENOLS</b>                    | [6]-Gingerol                                                                                                                                                                      | C17H26O4   | GNPS         |
|                                   | Vanillin                                                                                                                                                                          | C8H8O3     | GNPS         |
|                                   | Moupinamide                                                                                                                                                                       | C18H19NO4  | GNPS         |
| <b>PRENOL LIPIDS</b>              | Abscisic acid                                                                                                                                                                     | C15H20O4   | GNPS         |
|                                   | Abscisic acid                                                                                                                                                                     | C15H20O4   | GNPS         |
|                                   | Abscisic acid                                                                                                                                                                     | C15H20O4   | GNPS         |
|                                   | [6-acetyloxy-4-[[3-acetyloxy-4,5-dihydroxy-6-(hydroxymethyl)oxan-2-yl]oxymethyl]-7-(acetyloxymethyl)-7-hydroxy-4a,5,6,7a-tetrahydro-1H-cyclopenta[c]pyran-1-yl] 3-methylbutanoate | C27H40O15  | MolDiscovery |
| <b>PTERIDINES AND DERIVATIVES</b> | Lumichrome                                                                                                                                                                        | C12H10N4O2 | GNPS         |
|                                   | Riboflavin                                                                                                                                                                        | C17H20N4O6 | GNPS         |
| <b>PYRANS</b>                     | Maltol                                                                                                                                                                            | C6H6O3     | GNPS         |
| <b>STILBENES</b>                  | Resveratrol                                                                                                                                                                       | C14H12O3   | GNPS         |

Note: L-DAPs = Linear 1,3-diarylpropanoids



**Table S2.** List of metabolites putatively annotated using spectral libraries and in-silico predictions in flour flower.

| CHEMICAL CLASS                   | COMPOUND NAME                                                                                                                             | MOLECULAR FORMULA | ANNOTATION TOOL |
|----------------------------------|-------------------------------------------------------------------------------------------------------------------------------------------|-------------------|-----------------|
| AURONE FLAVONOIDS                | Bracteatin                                                                                                                                | C15H10O7          | GNPS            |
|                                  | (2Z)-4,6-dihydroxy-2-[(4-hydroxy-3,5-dimethoxyphenyl)methylidene]-1-benzofuran-3-one                                                      | C17H14O7          | GNPS            |
| BZD                              | Tyramine                                                                                                                                  | C8H11NO           | GNPS            |
| BENZOPYRANS                      | Ergochrom DD                                                                                                                              | C32H34O16         | MolDiscovery    |
| CARBOXYLIC ACIDS AND DERIVATIVES | N-Methyl-L-tryptophan                                                                                                                     | C12H14N2O2        | GNPS            |
|                                  | Tyrosine                                                                                                                                  | C9H11NO3          | GNPS            |
|                                  | Phenylalanine                                                                                                                             | C9H11NO2          | GNPS            |
|                                  | Chicoric acid                                                                                                                             | C22H18O12         | GNPS            |
|                                  | Asparagine                                                                                                                                | C4H8N2O3          | CSI:FingerID    |
|                                  | Proline                                                                                                                                   | C5H9NO2           | CSI:FingerID    |
| CAD                              | Moupinamide                                                                                                                               | C18H19NO4         | GNPS            |
| FATTY ACYLS                      | Palmitoleic Acid                                                                                                                          | C16H30O2          | GNPS            |
| FLAVONOIDS                       | Procyanidin B5-3'-O-gallate                                                                                                               | C37H30O16         | MolDiscovery    |
|                                  | 2-(3,4-dihydroxyphenyl)-6,8-bis[2-(3,4-dihydroxyphenyl)-3,7,8-trihydroxy-3,4-dihydro-2H-chromen-5-yl]-3,4-dihydro-2H-chromene-3,5,7-triol | C45H38O18         | MolDiscovery    |
|                                  | Tangeretin                                                                                                                                | C20H20O7          | GNPS            |
|                                  | Retusin                                                                                                                                   | C19H18O7          | GNPS            |
|                                  | Procyanidin B2                                                                                                                            | C30H26O12         | GNPS            |
|                                  | Peonidin-3-glucoside                                                                                                                      | C22H23O11         | GNPS            |
|                                  | Aromadendrin                                                                                                                              | C15H12O6          | GNPS            |
|                                  | Astragalin                                                                                                                                | C21H20O11         | GNPS            |
|                                  | Rutin                                                                                                                                     | C27H30O16         | GNPS            |
|                                  | Isorhamnetin 3-galactoside                                                                                                                | C22H22O12         | GNPS            |
|                                  | Quercetin                                                                                                                                 | C15H10O7          | GNPS            |
|                                  | Taxifolin-3-glucoside                                                                                                                     | C21H22O12         | GNPS            |
|                                  | 3-[3,4-Dihydroxy-6-(hydroxymethyl)-5-[3,4,5-trihydroxy-6-                                                                                 | C27H30O17         | GNPS            |

|  |                                                                                                                                             |           |      |
|--|---------------------------------------------------------------------------------------------------------------------------------------------|-----------|------|
|  | (hydroxymethyl) oxan-2-yl]oxyoxan-2-yl]oxy-2-(3,4-dihydroxyphenyl)-5,7-dihydroxychromen-4-one                                               |           |      |
|  | (2S,3S)-3,5,7-trihydroxy-2-[4-hydroxy-3-[(2S,3R,4S,5S,6R)-3,4,5-trihydroxy-6-(hydroxymethyl) oxan-2-yl] oxyphenyl]-2,3-dihydrochromen-4-one | C21H22O12 | GNPS |
|  | (2S,3S)-3,5,7-trihydroxy-2-[4-hydroxy-3-[(2S,3R,4S,5S,6R)-3,4,5-trihydroxy-6-(hydroxymethyl) oxan-2-yl] oxyphenyl]-2,3-dihydrochromen-4-one | C21H22O12 | GNPS |
|  | Rhamnetin 3-sophoroside                                                                                                                     | C28H32O17 | GNPS |
|  | (-)-Epicatechin gallate                                                                                                                     | C22H18O10 | GNPS |
|  | 3,5-Dihydroxy-2-(4-hydroxyphenyl)-7-[3,4,5-trihydroxy-6-(hydroxymethyl) oxan-2-yl]oxy-2,3-dihydrochromen-4-one                              | C21H22O11 | GNPS |
|  | Luteolin 7-(6''-malonylglucoside)                                                                                                           | C24H22O14 | GNPS |
|  | 6''-O-(3-Hydroxy-3-methylglutaroyl) astragalin                                                                                              | C27H28O15 | GNPS |
|  | Reinutrin                                                                                                                                   | C20H18O11 | GNPS |
|  | Kaempferol                                                                                                                                  | C15H10O6  | GNPS |
|  | Hesperidin                                                                                                                                  | C28H34O15 | GNPS |
|  | Luteolin-4'-o-glucoside                                                                                                                     | C21H20O11 | GNPS |
|  | Kaempferol 3-robinobioside                                                                                                                  | C27H30O15 | GNPS |
|  | 3,5-dihydroxy-2-(4-hydroxyphenyl)-7-[(2S,3R,5S,6R)-3,4,5-trihydroxy-6-(hydroxymethyl) oxan-2-yl] oxychromen-4-one                           | C21H20O11 | GNPS |
|  | Isovitexin                                                                                                                                  | C21H20O10 | GNPS |
|  | Isorhamnetin                                                                                                                                | C16H12O7  | GNPS |
|  | (+)-Catechin                                                                                                                                | C15H14O6  | GNPS |

|                             |                                                                                                                                                                             |            |               |
|-----------------------------|-----------------------------------------------------------------------------------------------------------------------------------------------------------------------------|------------|---------------|
|                             | Isotrifolin                                                                                                                                                                 | C21H20O12  | GNPS          |
|                             | Luteolon                                                                                                                                                                    | C15H10O7   | GNPS          |
|                             | 2'-O-galloylhyperin                                                                                                                                                         | C28H24O16  | GNPS          |
|                             | Taxifolin                                                                                                                                                                   | C15H12O7   | GNPS          |
|                             | 3,6,3',4'-<br>Tetramethoxyflavone                                                                                                                                           | C19H18O6   | GNPS          |
|                             | 3,3',4',5,7-<br>Pentahydroxyflavanone-<br>7-Methyl ether, 5-O-D-<br>glucopyranoside                                                                                         | C22H24O12  | Dereplicator+ |
| GLYCEROLIPIDS               | 1-Hexadecanoyl-sn-<br>glycerol                                                                                                                                              | C19H38O4   | GNPS          |
| GLYCEROPHOSPHOLIPIDS        | DHPE                                                                                                                                                                        | C37H74NO8P | MolDiscovery  |
|                             | PE (16:0/17:0)                                                                                                                                                              | C38H76NO8P | MolDiscovery  |
|                             | PE (15:0/16:0)                                                                                                                                                              | C36H72NO8P | MolDiscovery  |
|                             | 1-Palmitoyl-sn-glycerol                                                                                                                                                     | C42H82NO8P | GNPS          |
| IND                         | Tryptophan                                                                                                                                                                  | C11H12N2O2 | GNPS          |
| ISOFLAVONOIDS               | 11-Hydroxytephrosin                                                                                                                                                         | C23H22O8   | GNPS          |
|                             | Amorphigenin                                                                                                                                                                | C23H22O7   | GNPS          |
|                             | 6-Hydroxysumatrol                                                                                                                                                           | C23H22O8   | GNPS          |
|                             | 6a, 12a-Dehydrovillosin                                                                                                                                                     | C23H20O8   | Dereplicator+ |
| NAPHTHOFURANS               | Gelomulide N                                                                                                                                                                | C24H32O7   | GNPS          |
| ORGANONITROGEN<br>COMPOUNDS | Phytosphingosine                                                                                                                                                            | C18H39NO3  | GNPS          |
|                             | D-Cellobiose                                                                                                                                                                | C12H22O11  | GNPS          |
|                             | D-Glucose                                                                                                                                                                   | C6H12O6    | GNPS          |
|                             | D-Fructose                                                                                                                                                                  | C6H12O6    | GNPS          |
|                             | (2S,3S,4S,5R,6R)-6-(3-<br>benzoyloxy-2-<br>hydroxypropoxy)-3,4,5-<br>trihydroxyoxane-2-<br>carboxylic acid                                                                  | C16H20O10  | GNPS          |
|                             | Chlorogenic acid                                                                                                                                                            | C16H18O9   | GNPS          |
|                             | Pinitol                                                                                                                                                                     | C7H14O6    | CSI:FingerID  |
|                             | Levoglucozan                                                                                                                                                                | C6H10O5    | GNPS          |
| OXEPANES                    |                                                                                                                                                                             |            |               |
| PRENOL LIPIDS               | 7b,9-Dihydroxy-3-<br>(hydroxymethyl)-1,1,6,8-<br>tetramethyl-5-oxo-1,<br>1a,1b,4, 4a,5, 7a,7b,8,9-<br>decahydro-9ah-<br>cyclopropa[3,4]benzo[1,2-<br>e]azulen-9a-yl acetate | C22H30O6   | GNPS          |
|                             | 3-Isolongifolol                                                                                                                                                             | C15H26O    | GNPS          |
|                             | 2-[2-[5-[4-[4,5-Dihydroxy-<br>6-methyl-3-(3,4,5-<br>trihydroxy-6-methyloxan-<br>2-yl) oxyoxan-2-yl]oxy-<br>1,2, 4a,5-tetramethyl-                                           | C50H84O22  | GNPS          |

|  |                                                                                                                                                                         |  |  |
|--|-------------------------------------------------------------------------------------------------------------------------------------------------------------------------|--|--|
|  | 2,3,4,7,8, 8a-hexahydronaphthalen-1-yl]-3-methylpent-1-en-3-yl]oxy-5-hydroxy-6-methyl-3-(3,4,5-trihydroxy-6-methyloxan-2-yl) oxyoxan-4-yl]oxy-6-methyloxane-3,4,5-triol |  |  |
|--|-------------------------------------------------------------------------------------------------------------------------------------------------------------------------|--|--|

Note: BZD = Benzene and substituted derivatives. CAD = Cinnamic acids and derivatives. IND = Indoles and derivatives
